# Supplementary material
Source: PubMed Central journal article supplement (PMC6774341)

## SUPPLEMENT

### **Skp1 isoforms are differentially modified by a dual function prolyl 4-hydroxylase/N-acetylglucosaminyltransferase in a plant pathogen**

Hanke van der Wel, Elisabet Gas-Pascual and Christopher M. West

Dept. of Biochemistry & Molecular Biology, Center for Tropical & Emerging Global Diseases, Complex Carbohydrate Research Center, University of Georgia, Athens, GA 30602 USA

#### **SUPPLEMENTAL FIGURES**

**Fig. S1.** *P. ultimum* Phgt sequence.

**Fig. S2.** *P. ultimum* Skp1A sequence.

**Fig. S3.** *P. ultimum* Skp1B sequence.

**Fig. S4.** Alignment of predicted Skp1 sequences from select protists.

**Fig. S5.** Organisms with Phgt-like sequences in their genomes.

**Fig. S6.** Mass spectrometry of Skp1 modifications.

**Fig. S1. *P. ultimum* Phgt sequence.** Black nucleotides are from genomic DNA contig ADO01001287 (reverse complement of nt 28981-34080) at the NCBI wgs database; upper case nt represent the predicted ORF, and lower case nucleotides are non-coding; underlined nt represent intron splice signals. Blue nt are codon optimized for expression in *E. coli* and *D. discoideum*, with 5'- and 3'-restriction sites for cloning indicated; green nt encode the N-terminal FLAG-tag from pDM320 plasmid. Native amino acids are in bold black and are from the protein model PYU1\_T004073 at www.pythiumdb.org; red amino acids mark notes on the right; green amino acids represent the N-terminal extension that encodes the FLAG tag;

```

tgcgctccacacaggggtgctgtggccgtcg
acgaaccgggagcagatgcagaactcgtgcccgtcgatctcctcgtcaaagtgtacgggt
tgcggctgctgctgcagccactgcgccactgctcgtccgtgccaacggccgcatcttg
ccgagctggctgaccacgagcgcgcgctgctgcaatcaccgagctcgtcctgctgcttg
ccggccttgaacttttcgtggttggcgcacacctgcacgatctggcgcgcttgctgatg
cggagggcgaaggagctcatggcgtgggtccttgtgttgcggctgctttaatggagaaat
actaggacgctgtggatcaaagaataccggcgcgatgtaaagctccttgtggctgattgtg
actgctcatcagctcctcctcaccggtaatcaccgatcctgaatacctcctacaatatac
aacccttttaaaaaactaaaaagtaaatattgtacatttatcacacatagtatgaatta
ctttatcatgaatactttgctttatcaaagatactcattataaaaaggatgcccactttt
ttctattgaagttctgcttgaggctcgtcacggctcagactcagatgtcataccgtaca
gagacttagcaaagggcctgatcggatcaggcgtatgctactggatctgataccatcgt
-60

M D Y K D D D D K R S FLAG-tag
gattggattcgaatttgacacatccaattgaagccacgcgcaccagaagcacgcaggacg 0
ATGGATTATAAAGATGATGATGATAAAAAGATCT BglII

M D K K S L L S V L S P Q L Q A L V E A 20
ATGGACAAGAAATCGCTGCTGAGCGTGCTGTCGCCGCAACTGCAGGCGCTCGTGGAGGCT 60
ATGGATAAAAAGAGCTTGTGAGCGTTTTGAGCCCGCAATTGCAAGCGTTGGTTGAAGCG

S L G V P L Q A N A P A Q P L 35
TCTCTGGGCGTGCCACTGCAAGCGAACGCTCCAGCACAGCCACgtgcgccctctaaccaat 120
AGCTTGGGTGTGCCGTGCAAGCGAACGCGCCGGCGCAGCCGT

ccagagagcaacgggaaaagtggacacagctggtgacgaagcgacagaagctgcatagcg 180
gatcagcggacaggtgggagcagcaaagcaccctggttcaactacacgcccagcagtg 240
gcaacgggctgggtcgtccaaggaaagttgctggtgcaatgcaagctgaacccttcc 300
gaattgtttggtacgtacctgaaccagtctgtcatcacgccatatcaaatcgacgatac 360

L K H P E S P 42
gctttaactttgcgatttgatgtatgtacgcacttgtcagTTCTGAAGCACCCCGAGTCACCA 420
TGTTGAAGCACCCGGAGAGCCCG

G F V V K D A F L G S E H A V T V R D A 62 Start of P4H-like
GGCTTTGTCTGAAAGATGCGTTTTCTCGGATCGGAGCATGCTGTCACCGTGCCTGACGCA 480
GGCTTCGTGGTTAAAGATGCGTTTTTGGGTAGCGAACATGCGGTGACCGTTCGTGATGCG

L L A L T K T E S F H E A K V G H G D H 82
TTGCTCGCGCTCACGAAGACCGAATCGTTTCATGAAGCCAAGGTCGGACACGGCGATCAC 540
TTGTTGGCGTTGACCAAGACCGAGAGCTTCCACGAAGCGAAAAGTGGGCCACGGTGATCAC

L R N E R A V R G D R I H W V K R P S D 102
CTTCGCAACGAGCGTGCCGTGCGCGGAGACCGTATCCACTGGGTCAAGCGTCCCAGTGAT 600
TTGCGTAACGAGCGTGCCTGCGTGGTGACCGTATTCCTGGGTAAAGCGTCCGAGCGAC

L N R S D L L H P A I L Y L M K Q V E S 122
CTGAATCGGTCAGATCTGCTGCATCCTGCGATTCTGTACCTGATGAAGCAAGTCGAGAGT 660

```

TTGAACCGTAGCGATTTGTTGCACCCGGCGATCTTGTACTTGATGAAGCAGGTTGAAAGC

**A A Y A F K Q T N P D L D L R N V T S T** 142  
GCGGCGTACGCCCTTCAAACAGACCAATCCTGACCTGGATCTTCGGAACGTCACGTCCACG 720  
GCGGCGTATGCGTTCAAACAACCAACCCGGACTTGGATTTGCGTAACGTGACCAGCACC

**Q F A I F** 147  
CAATTTGCCATTTTTg<sub>u</sub>atcctttttttctgcttcatacttgctgcatcgttgtgaccc 780  
CAGTTCGCGATTTTT

attggtattggtatcagacattatgctccttgacctttgctgctgtgcttttgtgtgtag 840

**P G D G S R F V K H T D T Y S T A H Q D** 167  
CCAGGCGATGGGAGTCGATTTGTGAAGCACACAGACACGTACTCGACAGCGCACCAGGAC 900  
CCGGGCGATGGTAGCCGTTTTGTTAAACACACCCGACACCTACAGCACC GCGCACCAAGAT

**E S G T S S S S D G L V R V L T C V Y Y** 187  
GAAAGCGGCACTTCGTCTTCTTCCGATGGACTCGTGCCTGTTCTCACGTGTGTGATTAC 960  
GAGAGCGGTACCAGCAGCAGCAGCGATGGCTTGGTGCCTGTTTTGACCTGCGTGTACTAT

**L N Q D W V P E H E G Q L R V Y V K G T** 207  
CTGAACCAAGATTGGGTACCTGAGCACGAAGGCCAGCTGCGTGTGTACGTGAAGGGAACC 1020  
TTGAACCAGGACTGGGTTCCGGAGCACGAAGGCCAATTGCGTGTGTACGTTAAGGGTACC

**S T L L M Q H W D V A P K L D T L V V F** 227  
TCGACTCTTCTAATGCAGCACTGGGACGTTGCCCAAAGCTGGACACGCTGGTTCGTGTTT 1080  
AGCACCTTGTGATGCAGCACTGGGACGTTGGCGCCGAAATTGGATACCTTGGTTGTTTTC

**R S L D V E H E V L P T F Y E R M A I T** 247  
CGAAGTCTTGATGTGGAGCATGAGGTGCTTCCGACTTTTTTACGAGCGCATGGCGATAACA 1140  
CGTAGCTTGGATGTGGAGCACGAAGTTTTTGGCCGACCTTTTTATGAACGTATGGCGATTACC

**V W Y Y G H V A K Q P P D P A A S I E P** 267 **End of P4H-like**  
GTGTGGTACTATGGACACGTTGCAAAGCAACC GCGGACCCAGCAGCTAGTATCGAGCCT 1200  
GTTTGGTACTATGGTCATGTTGCGAAACAACCGCCGGACCCGGCGGCTAGCATTGAGCCG

**Q K Q Q R Q N S L E P P P S P S P N I L** 287  
CAGAAGCAACAACGACAGAATAGTCTAGAGCCACCGCCATCTCAAGTCAAACATTTTA 1260  
CAGAAACAGCAACGTCAGAACAGCTTGGAGCCGCGCCGAGCCCGAGCCGGAACATCTTG

**L S K E A S L G D A R T I F V G I P S Y** 307 **Start of GlcNAcT-like**  
TTATCGAAAAGAGCATCTCTGGGGGATGCACGTACCATTTTCGTTGGCATCCCAAGCTAT 1320  
TTGAGCAAAGAGGGATCCTTGGGTGACGCGCTACCATTTTCGTTGGGTATCCCGAGCTAC

**R D P E C R H T V A D L L H K A T F P D** 327  
CGTGATCCGGAATGCAGACACACGGTCGCGGATTTACTGCATAAAGCAACGTTTCCAGAC 1380  
CGTGACCCGGAATGCCGTACACCGTTGCGGATTTGTTGCACAAAGCGACCTTTCCGGAC

**R I H I G I Y L Q E D E N D D T L R H F** 347  
CGTATTACATCGGTATTTACTTTGAGGAGGACGAAAAATGACGATACGCTCCGCCACTTT 1440  
CGTATCCACATTGGCATCTACTTTGAGGAAGACGAAAAACGACGATACCTTGCCTCACTTC

**E E M Y P R S Q V R V Q F A D Y R S A A** 367  
GAAGAGATGTACCCACGCTCTCAAGTGC GCGTGCAGTTTGCGGACTACCGTAGTGCCGCT 1500  
GAGGAAATGTACCCGCTAGCCAGGTTGCTGTTCAATTTGCGGACTATCGTAGCGCGCG

**G P C V A R A G M Q K L W D G E D F Y L 387**  
GGCCCGTGTGTGGCTCGCGCAGGAATGCAGAAGCTGTGGGATGGGGAGGACTTCTACCTG 1560  
GGTCCGTGCGTGGCGCGTGC GGGTATGCAGAAGTTGTGGGACGGCGAGGATTTCTACTTG

**Q I D S H M R F R A G W D V F L L E Q L 407**  
CAAATCGACAGTCATATGCGATTCCGCGCAGGTTGGGACGTGTTTCTTCTCGAACAACTG 1620  
CAAATTGATAGCCACATGCGTTTCCGTGCGGGCTGGGACGTGTTTTTGTGGAACAGTTG

**L L C A T P K P I L T T Y P L G Y T L P 427**  
CTACTCTGCGCCACGCCAAAGCCGATCCTGACGACGTATCCGCTTGGGTACACACTGCCG 1680  
TTGTTGTGCGCGACCCCGAAACCGATCTTGACCACCTACCCGTTGGGTTATACCTTGCCG

**N N V S S D R R P T L L C A S A F D E N 447**  
AACAAATGTTTTCATCCGACCGCCGCCAACGCTATTATGCGCGTCAGCATTTCGATGAGAAC 1740  
AACAAACGTTAGCAGCGATCGTCGTCCGACCTTGTATTGCGCGAGCGCGTTTGACGAGAAC

**G I L R Q A S K T L A T I S P V 463**  
GGGATACTCCGTCAAGCCAGTAAACTCTCGCCACGATTTTCGCCAGTgtacgtatctggt 1800  
GGCATTTTGCGTCAAGCGAGCAAGACCTTGCGGACCATCAGCCCGT

gaaagtgcaacgctcttgctattgctgatgggtgtgtgtgtgtgtttatgcattctctctcag 1860

**P L P S S F W A A G F A F S S A K V I S 483**  
TCCTCTTCCTTCGAGCTTCTGGGCTGCCGGGTTTTCGTTTCTTCGGCCAAAAGTAATCAG 1920  
TCCGTTGCCGAGCAGCTTTTGGGCGGCGGGTTTTCGTTTAGCAGCGCGAAAAGTGATCAG

**E V P Y D E S L R F L F F G E E A S M S 503**  
CGAAGTCCCGTACGATGAGTCGTTGCGGTTTTTGTTTTTTCGGTGAAGAAGCGTCGATGAG 1980  
CGAGGTTCCGTACGATGAAAGCTTGCGTTTTTTGTTCCTTTGGCGAGGAAGCGAGCATGAG

**A R L W T S G W D F F T P G E S I I Y H 523**  
CGCTCGTCTGTGGACGTCGGGTTGGGATTTCTTTACGCCGGGCGAATCGATTATTTATCA 2040  
CGCGCGTTTTGTGGACCAGCGGTTGGGACTTCTTTACCCCGGGCGAAAAGCATCATTTACCA

**L W T R S Y R R V F Q E I E D N D T A V 543**  
CCTGTGACACGCTCGTATCGCCGTGTGTTTCAGGAGATTGAAGACAACGACACCGCGGT 2100  
CTTGTGACCCTAGCTATCGTCGTGTGTTCCAGGAGATTGAAGACAACGATAACCGCGGT

**W R T A S Q R Y V K S L L L G G G N N Q 563**  
GTGGAGAACAGCGTCGCAGCGGTATGTGAAGAGCTTACTTTTGGGTGGTGGCAACAATCA 2160  
TTGGCGTACCGCGAGCCAGCGTTATGTAAAGACTTATTGTTGGGTGGCGGTAACAACCA

**E P T G S I A A G T Y S L G S E R S L D 583**  
AGAGCCAACCTGGCAGCATCGCTGCTGGCACTTACTCTCTTGAAGCGAACGAAGCCTGGA 2220  
GGAACCGACCGGCAGCATTGCGGCGGGTACCTACAGCTTGGGCAGCGAACGTAGCTTGA

**A Y Q Q R I G V N F A K Q E I Q W E A E 603**  
CGCCTATCAGCAGCGTATTGGAGTCAATTTTGCAAAGCAGGAGATTTCAGTGGGAAGCAGA 2280  
TGCGTATCAGCAACGTATTGGCGTTAACTTTGCGAAAACAGGAGATCCAATGGGAGGCGGA

**W G N L D P I Q F E L A T K S A G V H A 623 End of GlcNAcT-like**  
ATGGGGTAATCTGGACCCGATCCAATTTGAACTCGCCACCAAATCTGCTGGTGTTCATGC 2340  
ATGGGGTAACCTGGACCCGATTCAGTTTCGAGTTGGCGACCAAGAGCGGGGTGTTCATGC

**P A \* 625**

GCCAGCtagatcaccttctcaccctgcgttcacttgctgggctttgacgagttttgatg 2400  
GCCGGCGTAAACTAGT SpeI

tttggaaatacaciaaatcattttatggaatgctatgaagtattcagggatttcttatcaaac  
atctagatttcttttgccctcgacgggaacctcctcacttacttttctcgatcagcgtct  
ttcccaacgtgaagtagaaaatcgacgaggttgcgtaggtcttcgatttcgatgaactcgc  
gcgcacaaatgtgctgctccgtgatgtttccggcaccacaaggtacgcattaccgtcgaact  
ggaagttaggggatgtccgtgttgaaacgaagcaatgtcggctcgtaaccttccacgactg  
tcaggtgcacaggggaggttagaagtgtacagctcgatgtcgacacgaccccgatacaattt  
tctacgcatagcgggaaatcataatgtaagatcaatggctatgcgcatcttccgcaatc  
agcaacagtagtttagtaccttcacacgatccatgatctttcagggttcgttgcagtcg  
gaaatgagcatcgagatgctgactccggaatagcgttcgctgcttgaccaccgttgat  
gatgccaatgttgagcgtcgtgacccaagctcctcagagtttgccattgctcgtgctt  
caggtcatggagcacgtcaatcaatggatcgattgcagaatcgccataggtgagggtagcc  
tattgggaataatagtgtacacagatatgtaagttatctcgaatcacgctgcatccaagc  
gcggcatactgacagcaggttacttaccactatgagccgacgaccctggcgagacagac  
gaattttgagaattcctttttgcaaggcaatcatcttcatgtccgttgggttaccgacca  
ccatgtgcttcggtttcaagcccaactcgttcgctttcttcatgccgctatggtcggttt  
cttcggagaccacatacagaagccccacatcttcagcaaaaccagcttcgacgagctttt  
gagacgcaatcatttgagcagcgaacaaactcttggcatcacaggatccacgtccataca  
acgttttcccgctccgttcgagccggtaggaaaggaggaacagtgtccatgtgcgagttga  
acagcaggctcgggctcttgttaccagtgcggctcgatacacattgtacctgtaacaag  
acgataagtgagaaggctgattgatcaatggcaaccgacagcattgcaacaacaacaaaa  
aacgtaccgatctgctttcacggcggcatcgccttgtggagcaaccttttgcagctccac  
tttccatccgtgagaggtaaaccagttctcgagggccttgccaactgcctcttcattgcc  
tgaagtgcattcgatattcatcaaaccgaggagagttccagcacgtcatcactgttgat  
gttcgccaatttggtgcagcagccaattgggcaacatgctccttcgacagttgtgaatc  
tgaagcattctcgtctgagctgatagccttcgaagtggaagatgacgcttgtcgccactt  
gccattcacgcaagttgctttcaccacgctgcttcggttcgaccaaagatgaaggcgcc  
aagcaacgaggctggattggagaacttcagctggtcttcattgatgtcgaccaacgcgaa  
atctgcaccgaaaccatccttgatctctccctattcaatgtagcgttgccatacaacat  
cagtaagcaagatagattttctcgagtaatgttatctgcgacgtaccactttcagatt  
caatgactctgcccattcttcgtcgcataacggaaaagcaactttgagagatcggtctc  
atcggttgcctccgtgcatacacctcgtcgactttgggtggagtcggtggccgtattccaa  
ccagcgcatctcttcgacacatatcaattctcgcatgagtcggtgccaaggcacactct  
gtctaggcagcttgcaatcactggaaat

**Fig. S2. *P. ultimum* Skp1A sequence.** Black nucleotides are from genomic DNA ADOS01001474.1 at the NCBI wgs database; upper case nucleotides represent the predicted ORF, and lower case nucleotides are non-coding; underlined nt represent intron splice signals; purple nucleotides are EST EL774563.2 (NCBI EST database). Blue nucleotides are codon optimized for expression in *E. coli* and *D. discoideum*, with 5'- and 3'-restriction sites for cloning indicated. Amino acids are in bold black and derived from protein model PYU1\_T013675 at www.pythiumdb.org.

```

tgtagggggttctctcgcagccagcaaccaataac -480
ttaccaaaggataacgaacccgtaagggaggggggagggggcAAAaggggggtacaatt -420
actgttcctgattctgaacggactgacttttgggagggattcgtacttcgggacaaagag -360
atgacagaagaggaatataacgtgtttcctgatctggcacaatttgttttccaaaggcgg -300
ttttaggggagcaatagcattgctttcaaccgcaacttcacgtcctgataagaccagatc -240
aagaaagacagaagaggtcatacccttttttggcaaaaccgagagcggtttttaaagcga -180
attgagcctgacaaaaatggatcgtgacaaaacaggaaagtattccgtcctcgtttttgtc -120

attaaaccaaaagaaagcgggtcttaagaggacaacccctgccttcctcgtcccttctct -60

ttttccttctttcagagccAAAagtccgcccacacacgacagcagcagagccccacgacc 0
      CCAAAAGTCCGCCACACACGACAGCAGCAGAGCCCCACGACC
                                          CC   NcoI

M A D T A P A P D A P R Q E E D T H K V 20
ATGGCCGACACCGCCCCCGCACCCGGACGCCCTCGCCAGGAGGAGGACACGCACAAGGTA 60
ATGGCCGACACCGCCCCCGCACCCGGACGCCCTCGCCAGGAGGAGGACACGCACAAGGTA
ATGGCTGATACAGCTCCCGCACCCAGATGCACCCAGGCAAGAAGAAGATACTCACAAGGTG

N L V S M D G D S F E V S R S V A S M S 40
AACCTCGTGTCCATGGACGGCGACAGCTTCGAGGTCTCGCGCAGCGTTCGCCTCCATGAGC 120
AACCTCGTGTCCATGGACGGCGACAGCTTCGAGGTCTCGCGCAGCGTTCGCCTCCATGAGC
AACCTGGTTAGCATGGATGGTGACAGCTTCGAAGTGAGCCGTAGCGTTGCGAGCATGAGC

E L V K T L I S D 49
GAGCTCGTCAAGACCCTCATCTCCGgtacgtgacgcgagagcgaataaagcggcgtttg 180
GAGCTCGTCAAGACCCTCATCTCCG
GAACTGGTTAAAACCCTGATCAGCG

cattattcgtgtgacgtgtgtggatatgctgtatgctgcgcttatgaccctgaacgtc 240
ctcattctacatagagcgcgtggatgttgatgaatgtgatgtagtgagcgcgtgc 300

E Q D D D E 55
attgtactaactgtgtttccgtcctaattccctatgtgagATGAACAGGACGACGATGAA 360
      ATGAACAGGACGACGATGAA
      ACGAGCAGGACGATGACGAA

V Q E I P L P N V K S T V L S K V I E F 75
GTACAGGAGATCCCCTTGCCGAACGTCAAGAGCACGGTGCTCTCGAAGGTCATCGAGTTC 420
GTACAGGAGATCCCCTTGCCGAACGTCAAGAGCACGGTGCTCTCGAAGGTCATCGAGTTC
GTGCAAGAGATTCCGCTGCCGAACGTGAAGAGCACCGTTCTGAGCAAAGTGATCGAGTTT

C S H H H N N P M R E I E K 89
TGCAGCCACCACCACAACAACCCAATGCGTGAGATCGAAAAGgtatggttgactgactgat 480
TGCAGCCACCACCACAACAACCCAATGCGTGAGATCGAAAAG
TGCAGCCACCACCACAACAACCCGATGCGTGAAATTGAGAAG

gtggggtgacgttttttaatctcgaatgggtgggtggctcactgttatggactgtatgtg 540

```

**P L K S S D M H D V V S D W D A N** 106  
 tggttacagCCATTGAAGAGCTCGGACATGCACGACGTGGTCTCGGACTGGGACGCCAAC 600  
 CCATTGAAGAGCTCGGACATGCACGACGTGGTCTCGGACTGGGACGCCAAC  
 CCGCTGAAAAGCAGCGATATGCACGACGTGGTTAGCGATTGGGACGCGAAC

**F V D I E Q D I L F E L I L A A N Y M D** 126  
 TTTGTGGACATTGAGCAGGACATCCTCTTCGAGCTGATCCTGGCGGCCAACTACATGGAC 660  
 TTTGTGGACATTGAGCGGGACATCCTCTTCGAGCTGATCCTGGCGGCCAACTACATGGAC  
 TTCGTTGATATCGAACAAGACATTCTGTTTGGAGCTGATCCTGGCGGCCAACTACATGGAT

**I K S L L D L A C A K V A S M I K G K T** 146  
 ATCAAGAGCCTGCTCGATCTGGCGTGC GCGAAGGTCGCGAGCATGATCAAGGGCAAGACC 720  
 ATCAAGAGCCTGCTCGATCTGGCGTGC GCGAAGGTCGCGAGCATGATCAAGGGCAAGACC  
 ATTAAGAGCCTGCTGGACCTGGCGTGC GCGAAGGTTGCGAGCATGATCAAGGGCAAAACC

**P Q E I R E T F N I V N D F T P E E E S** 166  
 CCGCAGGAGATCCGCGAGACTTTCAACATTGTGAACGACTTCACACCCGAGGAAGAGAGC 780  
 CCGCAGGAGATCCGCGAGACTTTCAACATTGTGAACGACTTCACACCCGAGGAAGAGAGC  
 CCGCAGGAAATCCGTGAGACCTTCAACATTGTGAACGATTTTACCCCGAGGAAGAGAGC

**Q I R E E N K W C E E A \*** 178  
 CAAATCCGCGAGGAGAACAAGTGGTGC GAAGAAGCGtagggcggttagtcagtcaccgaat 840  
 CAAATCCGCGAGGAGAACAAGTGGTGC GAAGAAGCGTAGGCGGCTAGTCAGTCACCGAAC  
 CAAATTCGTGAAGAGAACAAGTGGTGC GAAGAGGCGTAAACTAGT SpeI

gcagaacggcgacgaccccggtccttgggctcgattgccggttgtagcagcagtcagttcacc 900  
 GCAGAACGGCGACGACCCCGGTCCTTGGGCTCGATTGCCGTTGTGCAGCAGTCCGTTCCACC

atttgcgctctgcatattagtcagctgattgattgagggagagcagcgagcagtcagtg 960  
 ATTTGCGCTCTGCATATTAGTCAGCTGATTGATTGAGGGAGAGCAGCGAGCAGTCAGTGG

attggetctcagggttttcttttgtttcctgtcggeccatccgcgatcttgaatagaggtc 1020  
 ATTGGCTCTCATGTTTTCTTTTGTTCCTGTGCGCCCATCCGCGATCTTGAATAGAGGTC

gtggactctttattaaatggacatcagcggatggcggtgcattttacacggtaattgataaa 1080  
 GTGGACTCTTTATTAATGGACATCAGCG

gagtcggttgcttcataactaatgcacacactgtcatgcacgcatccctgctaaagtgctgc 1140  
 attttatacgcgatgagacgcaacgagctgccggctgtcagcatgaagaaaatgcttcagc 1200  
 atgaagagcccatgagcagacaaggcaaatgggagacggtttggcgccactctttctagat 1260  
 ttttgtttgtttcggtgtgctaaattcctcttggcgcatgaatactacatgcaggtaggg 1320  
 atatggaattctacagattggatgggattgtttggtgttggtatgtatcatccttaattg 1380  
 cgtgatctctctgggaggagcaagaacacaaactcaacaggacggggccgctggtataaac 1440  
 ggtcgctattgcagtcgcttgt 1462

**Fig. S3. *P. ultimum* Skp1B sequence.** Black nucleotides are from genomic DNA ADOS01001682.1 at the NCBI wgs database; upper case nucleotides represent the predicted ORF, and lower case nucleotides are non-coding; purple nucleotides are ESTs from NCBI EST db (1, EL776046.2; 2, FE995571.1; 3, FF026581.1; 4, FF014550.1; 5, FF017573.1; 6, FF023366.1); blue nucleotides are codon optimized for expression in *E. coli* and *D. discoideum*, with 5'- and 3'-restriction sites for cloning indicated. Amino acids are in bold black and were from protein model PYU1\_T011629 at www.pythiumdb.org with the C-terminal region adjusted based on genomic DNA data.

```

tccgcagctaacag -60

cccaagaagcgctccgcctcccaagacctcttcgccttctttctacctgccagt 0
TC BspHI

M S D A A T T P L D G R K V K L V S M D 20
ATGAGCGACGCTGCTACCACCCCTCTCGACGGCCGCAAGGTCAAGCTGGTCTCCATGGAT 60
GGGGGGTTCTAAGCTGGTCTCCATGGAT 4
GGGGGGTTC-AAGCTGGTCTCCATGGAT 5
CCGGGGTTTACGGTCCGCAAGGTCAAGCTGGTCTCCATGGAT 6
ATGAGCGATGCGGCGACCACCCCGCTGGATGGTTCGTAAGGTGAACTGGTTAGCATGGAC

G Q T Y E V D A A V A S L S K L V S T L 40
GGCCAGACCTACGAAGTGGACGCCGCTGTGGCCTCGCTCAGCAAGCTGGTGAGCACGCTG 120
GGCCAGACCTACGAAGtggacgcgcgctgtggcctcgctcagcaagctggtgagcacgctg 4
GGCCAGACCTACGAAGtggacgcgcgctgtggcctcgctcagcaagctggtgagcacgctg 5
GGCCAGACCTACGAAGtggacgcgcgctgtggcctcgctcagcaagctggtgagcacgctg 6
GGCCAGACCTACGAAGTGGATGCGGCGGTTGCGAGCCTGAGCAAGCTGGTGTCTACCCTG

V S D N A D E D E V Q E M P L P N V K S 60
GTGTCGACAACGCTGACGAGGACGAGGTGCAGGAAATGCCGTTGCCGAACGTCAAGAGC 180
cgttgccgaacgtcaagagc 1
aatgccggttgccgaacgtcaagagc 2
gtgtcggacaacgctgacgaggacgaggtgcaggaaataaccgttgccgaacgtcaagagc 4
gtgtcggacaacgctgacgaggacgaggtgcaggaaataaccgttgccgaacgtcaagagc 5
gtgtcggacaacgctgacgaggacgaggtgcaggaaatgccgttgccgaacgtcaagagc 6
GTTAGCGACAACGCGGACGAAGATGAGGTGCAAGAGATGCCGCTGCCGAACGTGAAGAGC

H V L E K V V A F C E H H H K H P M K E 80
CACGTGCTCGAGAAGGTGGTGGCGTTCTGCGAGCATCACCACAAGCACCCGATGAAGGAG 240
cacgtgctcgagaaggtggtggcgcttctgcgagcatcaccacaagcaccgatgaaggag 1
cacgtgctcgagaaggtggtggcgcttctgcgagcatcaccacaagcaccgatgaaggag 2
cacgtgctcgagaaggtggtggcgcttctgcgagcatcaccacaagcaccgatgaaggag 4
cacgtgctcgagaaggtggtggcgcttctgcgagcatcaccacaagcaccgatgaaggag 5
cacgtgctcgagaaggtggtggcgcttctgcgagcatcaccacaag 6
CACGTTCTGGAAAAAGTGGTTGCGTTCTGCGAGCACACCACAAGCACCCGATGAAAGAA

L E K P L K S N D L R D A V S D W Y A D 100
CTAGAGAAGCCGCTCAAGAGCAACGATCTACGCGATGCGGTCTCGGACTGGTACGCGGAC 300
ctagagaagccgctcaagagcaacgatctacgcgatgcggtctcggactggtacgcggac 1
ctagagaagccgctcaagagcaacgatctacgcgatgcggtctcggactggtacgcggac 2
CTGGAGAAGCCGCTGAAAAGCAACGACCTGCGTGATGCTGTGAGCGACTGGTACGCGGAT

F V E V K Q E D Q E L L F E L I L A A N 120
TTTGTGGAGGTGAAGCAGGAAGATCAGGAGCTCCTGTTGAGCTGATCCTGGCCGCGAAC 360
tttgtggaggtgaagcaggaagatcaggagctcctgtttgagctgatcctggccgcgaac 1
tttgtggaggtgaagcaggaagatcaggagctcctgtttgagctgatcctggccgcgaac 2
agatcaggagctcctgtttgagctgatcctggccgcgaac 3
TTCGTGGAAGTTAAGCAGGAAGATCAAGAGCTGCTGTTTGGAGCTGATCCTGGCGCGAAC

```



**Y L D I K N L L D L A C A K V A T M I K 140**  
TACTTAGATATCAAGAATCTACTCGATTTGGCGTGCGCAAAGGTTGCGACAATGATCAAA 420  
tacttagatatcaagaatctactcgatTTGGCGTGCGCAAAGGTTGCGACAATGATCAAA 1  
tacttagatatcaagaatctac 2  
tacttagatatcaagaatctactcgatTTGGCGTGCGCAAAGGTTGCGACAATGATCAAA 3  
TATCTGGACATTAAGAACCTGCTGGATCTGGCGTGCGCAAAGTTGCGACCATGATCAAG

**G K T P E E I R A T F G I T E E F T P E 160**  
GGCAAGACCCCTGAAGAGATCCGTGCGACGTTTGGCATTACTGAGGAGTTCACTCCCGAA 480  
ggcaagacCCCTGAAGAGATCCGTGCGACGTTTGGCATTACTGAGGAGTTCACTCCCGAA 1  
ggcaagacCCCTGAAGAGATCCGTGCGACGTTTGGCATTACTGAGGAGTTCACTCCCGAA 3  
GGTAAAACCCCGGAGGAAATCCGTGCGACCTTCGGCATTACCGAGGAATTTACCCCGGAG

**E E Q R I R E E N K W C E D I \* 175**  
GAAGAACAGCGCATTCCGTGAAGAGAACAAGTGGTGCGAAGATATTtaagcgcgagttcac 540  
gaagaacagcgcattcgtgaagagaacaagtggTgCGAAGATATTtaagcgcgagttcac 1  
gaagaacagcgcattcgtgaagagaacaagtggTgCGAAGATATTtaagcgcgagttcac 3  
GAAGAGCAGCGTATCCGTGAAGAGAACAATGGTGCGAAGACATTTAAACTAGT SpeI

gagcgaatggaacaggtaagttgCGTGTGGATGTATTTCTGTATGTGCCTTTCTCTCATG 600  
gagcgaatggaacaggtaagttgCGTGTGGATGTATTTCTGTATGTGCCTTTCTCTCATG 1

cctactagaggtgctggattcagataatggTcatgaatgaaggctcagtttgTattgcac 660  
cctactagaggtgctggattcagataatggTcatgaatgaaggct 1

gagcgcgTgTTTTTATGCCGTCACCATCCCCTTGGCGGTTTATGTTGAGCGACGAAACGA 720  
cagaccatgCCGCGCGAGAGTGTGGAAGCAATGGACAGCGACAAGCGATGCTTTTGT 780  
ggcaggtcagctCGCTTCAAGCGCAAGTGAGCATTGCCCAATTGTACCAGCAACCTCAA 840  
cgagcagatactgagatgcaggctctagttcaatATGCATCAACTGCAGCCTGCCATGTT 900  
acatacacgTGTGCATTTGAAGCTCCTTGTATTGGCACGGAGGTC 960

**Fig. S4. Predicted Skp1 sequences from select protists.** The modified Pro residue is marked with an asterisk. Uncertain amino acids are replaced with a question mark. To facilitate visualization of relatedness, acidic residues are in blue, basic in dark red, Gly and Pro in red, and hydrophobic in green. Positions possessing a consensus chemical characteristic are highlighted, in yellow (hydrophobic), gray (acidic), dark grey (basic), or teal (small).

|          |                                        |                             |                                                        |
|----------|----------------------------------------|-----------------------------|--------------------------------------------------------|
| Dd Skp1A | <i>Dictyostelium discoideum</i>        | amoebozoa/mycetozoa         | NCBI, AAA67888.1                                       |
| Tg Skp1  | <i>Toxoplasma gondii</i>               | alveolate/apicomplexa       | ToxoDB, TGARI_207680                                   |
| Ng Skp1A | <i>Naegleria gruberi</i>               | excavate/percolozoa         | DOE, version 1.0, 2/2009: in scaffold 5: 131842-132718 |
| Ng Skp1B | <i>N. gruberi</i>                      |                             | NCBI, XP_002681295.1                                   |
| Tp Skp1A | <i>Thalassiosira pseudonana</i> 38460  | stramenopile/diatom         | NCBI, XP_002294707.1                                   |
| Tp Skp1B | <i>T. pseudonana</i> 10077             |                             | NCBI, XP_002294049.1                                   |
| Fc Skp1A | <i>Fragilariopsis cylindrus</i> 212070 | stramenopile/ diatom        | NCBI, OEU09899.1                                       |
| Fc Skp1B | <i>F. cylindrus</i> 213790             |                             | NCBI, OEU16705.1                                       |
| Ps Skp1A | <i>Phytophthora sojae</i> 108319       | stramenopile/oomycete       | NCBI, XP_009526241.1                                   |
| Ps Skp1B | <i>P. sojae</i> 108223                 |                             | NCBI, XP_009532045.1                                   |
| Pr Skp1A | <i>Phytophthora ramorum</i> 71411      | stramenopile/oomycete       | DOE, 71411 fgenesh1_pm.C_scaffold_18000002, 6/2007     |
| Pr Skp1B | <i>P. ramorum</i> 71622                |                             | DOE, 71622 fgenesh1_pm.C_scaffold_32000004, 6/2007     |
| Pi Skp1A | <i>Phytophthora infestans</i> 01260.1  | stramenopile/oomycete       | NCBI, XP_002907933.1                                   |
| Pi Skp1B | <i>P. infestans</i> 15216.1            |                             | NCBI, XP_002898672.1                                   |
| Pu Skp1A | <i>Pythium ultimum</i>                 | stramenopile/oomycete       | PYU1_T013675, www.pythiumdb.org                        |
| Pu Skp1B | <i>P. ultimum</i>                      |                             | PYU1_T011629, www.pythiumdb.org, EST data NCBI         |
| Es Skp1A | <i>Ectocarpus siliculosus</i>          | heterokontophyta/brown alga | NCBI, CBJ48672.1                                       |
| Es Skp1B | <i>E. siliculosus</i>                  |                             | NCBI, CBJ48849.1                                       |
| Gt Skp1A | <i>Guillardia theta</i> CCMP2712       | cryptophyta/cryptomonad     | NCBI, XP_005838866.1                                   |
| Gt Skp1B | <i>G. theta</i> CCMP2712               |                             | NCBI, XP_005840806.1                                   |
| Al Skp1  | <i>Albugo laibachii</i>                | stramenopile/oomycete       | NCBI, CCA15417.1                                       |
| Eh Skp1  | <i>Emiliania huxleyi</i>               | haptophyte/phytoplankton    | NCBI, XP_005781634.1                                   |
| Vc Skp1  | <i>Volvox carteri</i>                  | cryptophyta/green alga      | NCBI, XP_002947872.1                                   |
| Cv Skp1  | <i>Chlorella virus</i> PBCV-1          | virus                       | NCBI, NP_048387.1                                      |
| Sc Skp1  | <i>Saccharomyces cerevisiae</i>        | yeast                       | NCBI, NP_010615.3                                      |
| Hs Skp1  | Homo sapiens OCP2                      | human                       | NCBI, NP_008861.2                                      |

```

Dd Skp1A      MSLVVKLESSEDEKVFETEKETA*CMSVTKNMI*EDIGESDS-----
Tg Skp1      MSKERMGDARKVTLV*SQEGDEFD*VIEVA*SMSALIK*TMV*EEDSDCQE-----
Ng Skp1A
Ng Skp1B      MSETKQVELT*SKDKVSFKV*DRD*VILMSGLVKD*MLEEG--DEDETP-----
Tp Skp1A      ?--SKEGDTFPV*DI*EVA*RMSELVK*G*MLEDDADDDEEAT-----
Tp Skp1B      MDGDDAHGT*VKLV*SKEGDTFEV*PI*EVA*KL*SNLVV*TTL*GEEDDYDDDDDNMV-----
Fc Skp1A      MDVEDSKETA*ASTADTSSSGVTIQ*LI*SKEGDKFP*PV*PI*TV*SNMSELVK*SM*DDKDDDDDDDDDED*DDGKEKIT
Fc Skp1B      MDEENGIVKLV*SKEGDVHEV*PIN*VAKMSSL*IL*STLDDDEEDDDDEET*KKHL-----
Ps Skp1A      MSDAAAA*PAQDVPKEEDSRKVN*LV*SM*DGDSFEVSR*SV*AA*MS*ELVK*TL*ISDD-ADDDEVQ-----
Ps Skp1B      MAPQE*PAADMKV*LV*SM*DG*EAFEV*DAKVA*VMS*QLV*Q*TLV*ADEQE*QGDEVQ-----
Pr Skp1A      MSDAAA*PAQDAPAQEDLRKVN*LV*SM*DGDSFEVSR*SV*AA*MS*ELVK*TL*ISDD-ADDDEVQ-----
Pr Skp1B      MAPHET*TKV*LV*SM*DG*EAFEV*DA*SV*AV*MS*QLV*Q*TLV*AD---EGDEVQ-----
Pi Skp1A      MSDAAA*PAQDTPRQEEDSRKVN*LV*SM*DGDSFEVSR*GV*AA*MS*ELVK*TL*ISDD-ADDDEVQ-----
Pi Skp1B      MAP*STKMKV*LV*SM*DG*EAFEV*DT*SV*AV*MS*ELVK*TLV*ADDQE*EGGEVQ-----
Pu Skp1A      MADTAPAPDAPRQEED*THKVN*LV*SM*DGDSFEVSR*SV*AA*MS*ELVK*TL*ISDE-QDDDEVQ-----
Pu Skp1B      MSDAAT*PLDGRK*V*LV*SM*DGQTYEV*DA*VA*SL*SKLV*STLV*SDN-AEDE*VQ-----
Es Skp1A      MSALEEK*SQAADAPADE*TED*TRSVHLV*SQEGESFDIKV*SVAK*MSNLV*TKMI*DEDAEEDGDAQ-----
Es Skp1B      MATE*SGSSSRVQKT*TS*SDGAVG*SA*RT*TR*TD*TG*ASSSGAV*TLV*SM*DG*DG*FVVE*ASA*IEV*SK*LLK*AMV*DGP--TENAAK-----
Gt Skp1A      MSEADPEIT*LETYDKHQIKI*PK*SI*AT*RS*AI*IN*MI*EDT-GDVNEVV-----
Gt Skp1B      MSSSKRMV*TL*SPDKQ*TFQ*P*WD*VAM*RS*TV*IK*Q*MLEDL-PEPEEGAEDQ*TPV-----
Al Skp1      MEEAATAGGM*QPETAAPHEDGRKVN*LV*SM*DGDSFEVSR*SV*AA*MS*ELVK*TL*IADG-TDDQEIQ-----
Eh Skp1      MADDSEATAVK*LK*SKQEE*IFEVE*KEVA*CR*SV*TK*NMV*EDT---GLDT-----
Vc Skp1      MSGSKVK*LM*SSD*TM*Q*MF*EV*DEEAA*FQ*SQ*TV*KNL*VEDA---GTDD-----
Cv Skp1      MSIV*FT*TSDFHRIEAD*KNVLDQ*STV*INDV*EDV---GDDE-----
Sc Skp1      MVT*SNV*LV*SGEGER*FTV*DKK*IA*ERS*LL*KNY*LV*MD*HDS*NL*QNNSD*SES*SD*SET
Hs Skp1      MPSIKLQ*SSDGEIFEV*DV*EIAKQ*SVTK*TM*LEDL-GMDDEGDD-----

```

Dd Skp1A -----PIPLPNVTSTILEKVLVDYCRHHHQHP-SPOGDD-----KKDEKRLDDI-PPYDRDFCK---  
 Tg Skp1 -----SIPLPNVDTCLIKKIIEYCEHHHNNP-PEEIPK-----PLKSSNLAEVVSEWDYQFINEN-  
 Ng Skp1A ?QLVLPQVDVVFGLASQSEAQLFSLFLTFGFELMSLGGDFEIQKPNTRFCEFLPNFVAEYFEN--  
 Ng Skp1B -----IIPLPNVDSKPLQKVIIEYCYHHKEP-AQEIEK-----PLKG-KIEDVTCWDKFFLE---  
 Tp Skp1A -----EIPLPNVKSTVLKKEVIEFCVHHRSEP-MTEIEK-----PLKSAAMAEEVQKQWYADFVN---  
 Tp Skp1B -----EIPLPNVKSSVLAKEVIEYCTHYNQDP-MTPIIT-----PLKSNRIEEIIVQEWYAHFVD---  
 Fc Skp1A -----EIPLPNVKSEVLKKEVIEFCEHHLAEP-MTEIEK-----PLKSNMADVVQKQWYADFVD---  
 Fc Skp1B -----EIPLPNVKNAVLTKVIEYCKHYTNDEAMTQIQ-----PLKSSKIEDLVQTYWYAGFVD---  
 Ps Skp1A -----EIPLPNVKSPVLSKVIIEFCVHHHNSP-MREIEK-----PLKSADMHDVSDWDANFVD---  
 Ps Skp1B -----EIPLPNVKAHVLAKEVVEFCVHHKDAP-MAEIQK-----PLKSNVLSSEVDEW-----  
 Pr Skp1A -----EIPLPNVKSPVLSKVIIEFCVHHHNSP-MREIEK-----PLKSADMHDVSDWDANFVD---  
 Pr Skp1B -----EIPLPNVKAHVLAKEVVEFCVHHKDAP-MAEIQK-----PLKSNVLSSEVDEWDFVVDG-  
 Pi Skp1A -----EIPLPNVKSPVLSKVIIEFCVHHHNSP-MREIEK-----PLKSADMHDVSDWDANFVD---  
 Pi Skp1B -----EIPLPNVKSHVLAKEVVEFCVHHKDAP-MAEIQK-----PLKSNVLSSEIDAWDAKFVDL---  
 Pu Skp1A -----EIPLPNVKSTVLSKVIIEFCVHHHNSP-MREIEK-----PLKSSDMHDVSDWDANFVD---  
 Pu Skp1B -----EIPLPNVKSHVLEKVVAFCEVHHKHP-MKELEK-----PLKSNDLRDAVSDWYADFVEVKQ  
 Es Skp1A -----EIPLPNVKASVLSKVIIEFCVHYKEDP-MNEIEK-----PLKSANMHDVQEWYAKFVE---  
 Es Skp1B -----EIPLPNMRSNVVAKVVEFCVHHQTDV-MTDIPK-----VQFGKTVGDVQEWYSTFVKA--  
 Gt Skp1A -----PLADKSCITLIMNRVIEYLKKAHAEFDNT-----GADDEVINEFDKEFQE---  
 Gt Skp1B -----PLMDRSCSANVLEKVLKLLKHHDFDKS-----NASQEDKDAWKKYVE---  
 Al Skp1 -----EIPLPNVKSTVLSKVIIEFCVHHHTMP-MEDIDK-----PLKSSDMQEVVSEWDANFVD---  
 Eh Skp1 -----PVPLPMVDSKILIKVIEYCKYHHRA-----EQESLPEDEKNVWDKDFVK---  
 Vc Skp1 -----AIPLPNVSGRILAKVIEYCKYHVEAEKKA-----DDKPMKTEDEVKRWDEEFVK---  
 Cv Skp1 -----PIPLPTITAKVLTKILEYCSFYNV-----HTEREIKDFDKGFVN---  
 Sc Skp1 NHKSKDNNNGDDDDDEDDDEIVMPVNVRSVLOKVIIEWAEHHRDSNFP-----DEDDDSRKSAPVDSWDREFLK-  
 Hs Skp1 -----PVPLPNVNAAILKVIQWCTHHKDDPPPP-----EDDENKEKRTDDIPVWQDFELK---

\*

Dd Skp1A VDQPTLFELILAA NYLDIKPLLDVTCKTVANMIRG-KTPEEIRKIFNINIKNDFTPPEEEQIRKENEWCEDKGGN\*  
 Tg Skp1 SDQKILFALILAA NYLNIKPLLDLSVAKVATMIKA-KTPEEIRRFNINIVNDFTPPEEEAQVREENKWCEDA\*  
 Ng Skp1A LDQVHLFALILAA NATFSKILDLCAQVANMIRG-KSPEQIRDTFNINIKNDFTPPEEEEAVRRENSWVEE\*  
 Ng Skp1B IDQSLLELILMAA NYLNIKLLDLTCAKVASMIKG-KSPEQIREMFGIENDFTPEEEAKIREENKWCESA\*  
 Tp Skp1A VEQVLLFELILAA NYMDIKPLLDLTCAVASMIRG-KTPEEIRKTFNINIANDFSPPEEEAQVREENKWCCEP\*  
 Tp Skp1B VEQILLFELILAA NYMDIKALLDLTCLAVSVLIRG-KSAEEIRRFNINISNDFSPPEEEAQVSKENQFDGTSSSS\*  
 Fc Skp1A LEQVLLFELILAA NYMDIKPLLDLTCAVASMIRG-KTPDEIRATFNITNDFSPPEEEAQVREENKWCESA\*  
 Fc Skp1B VEQTLLFELVTAANFMDIKPLLDLTCLAVSISIKG-KTAPQIREIFNINISNDFSQPEEEAQVREESQWSOEDTPAVPAAAAAANEEKEE\*  
 Ps Skp1A IEQEILFELILAA NYMDIKSLDLLCAKVASMIKG-KTPQEIRETFNINIVNDFTPPEEEAQIREENKWCESA\*  
 Ps Skp1B DANFVDFELILAA NYMDIKSLDLLCAKMACMIKG-KTPEEIRATFGITEEFTEEEQQRILEENKWCES\*  
 Pr Skp1A IEQEILFELILAA NYMDIKSLDLLCAKVASMIKG-KTPQEIRETFNINIVNDFTPPEEEAQIREENKWCESA\*  
 Pr Skp1B ENQEILFELILAA NYMDIKSLDLLCAKVASMIKG-KSPEEIRATFGITEEFTEEEQQRILEENKWCEDV\*  
 Pi Skp1A IEQEILFELILAA NYMDIKSLDLLCAKVASMIKG-KTPQEIRETFNINIVNDFTPPEEEAQIREENKWCESA\*  
 Pi Skp1B EDQEILFELILAA NYMDIKSLDLLCAKVASMIKG-KTPEEIRATFGITEEFTEEEQQRILEENVDRGRVTSHTGTNQAGRVL\*  
 Pu Skp1A IEQDILFELILAA NYMDIKSLDLLCAKVASMIKG-KTPQEIRETFNINIVNDFTPPEEESQIREENKWCESA\*  
 Pu Skp1B EDQEILFELILAA NYLDIKNLLDLLCAKVASMIKG-KTPEEIRATFGITEEFTEEEQQRILEENKWCEDI\*  
 Es Skp1A VQOETLFELILAA NYMDIKPLLDLTCAVASMIRG-KTAAEIRKTFNINIVNDFTPPEEEAQVREENKWCEDA\*  
 Es Skp1B LKDEMLFELILAA NYLDLSPLELCAATVGLRAMN-KTPEEIQREFNINIKEPFSPEVERTLRQENKWSPEPPIGS\*  
 Gt Skp1A QSDEIIFQILAA NFDIKNLLELMCKKVADETKKCTPDDIRDRFNIRKDYTPPEEVEVKRAHPWIYDKNAK\*  
 Gt Skp1B VEDEVLFHLILAA NFDIKLLDLTCKTVAEYIKQCKTPEEIRLRFNINIPNDFTPPEEEEVKRENKWCCEAPS\*  
 Al Skp1 VEQEILFELILAA NYMDIKSLDLLCAKVASMIKG-KTPQEIRDTFNINIVNDFTPPEEESQIREENKWCESA\*  
 Eh Skp1 VDETLFNLILAA NYLDIKSLDLTCKTVAEYIKG-KTPEEIRRFNINIKNDFTPPEEEEVKRENKWCCEER\*  
 Vc Skp1 VDQATLFDLILAA NYLNIKGLLDLTCQTVQMIKG-KTPEEIRKTFNINIKNDFTPPEEEVRRRENKQWAF\*  
 Cv Skp1 INMDFMFDLIQGANFNLNIKGLLDVLC AAVADRIRG-KTPEQIREVFGIENDLTPPEEEAAALAEHSWTHLVPIDY\*  
 Sc Skp1 VDQEMLYEIIILAA NYLNIKPLLDAGCKVVAEMIRG-RSPEEIRRTFNINIVNDFTPPEEEAARRENEWAEDR\*  
 Hs Skp1 VDQGTLFELILAA NYLDIKGLLDVTCKTVANMIRG-KTPEEIRKTFNINIKNDFTPPEEEAQV-GSTQFCL\*

**Fig. S5. Organisms with Phgt-like sequences in their genomes.**

**Green algae**

Charophytes

Kn *Klebsormidium nitens* (green algae)

Chlorophytes

Vc *Volvox carteri* (chromalveolata – chlorophyta)

Chlorella *Chlorella variabilis*

Coccomyxa *Coccomyxa subellipsoidea*

**Stramenopiles**

Oomycetes

Pi *Phytophthora infestans*

Ps *Phytophthora sojae*

Pr *Phytophthora ramorum* (heterokont)

Pu *Pythium ultimum* (parasitic oomycete, stramenopile)(heterokont)

Pa *Pythium aphanidermatum* (parasitic oomycete, stramenopile)

Al *Albugo laibachii* Nc14, white rust oomycete

Spar *Saprolegnia parasitica* (heterokontophyta; fish pathogen) (Heterokonta – Oomycete)

Ae *Aphanomyces euteiches*, strain 109

Ai *Aphanomyces invadans*

Diatoms

Tp *Thalassiosira pseudonana* (DOE diatom db; jgi|Thaps3|4441|fgenes1\_pg.C\_chr\_4000391)

To *Thalassiosira oceanica*

Fc *Fragilariopsis cylindrus* (coldwater (arctic) diatom, stramenopile, from DOE)

Brown algae

Es *Ectocarpus siliculosus* (brown algae, stramenopile) (Heterokonta – Phaeophyceae)

**Alveolates**

Ciliates

Sl *Stylonychia lemnae*

Ot *Oxytricha trifallax* (ciliated protozoan)

Dinoflagellate

Sm *Symbiodinium microadriaticum* (Alveolata - Dinophyceae)

**Cryptophytes**

Gt *Guillardia theta* CCMP2712 (GI:428176508) (Chromalveolata – cryptophyta)

**Haptophytes**

Eh *Emiliana huxleyi* (see E.huxleyi doc in “worldwide”) (Chromalveolata – Haptophyta)

**Excavates**

Ng *Naegleria gruberi* (amoeba-flagellate) (excavate – percolozoa)

**Fungi**

Chytridiomycota

Rhizo *Rhizoclostridium globosum* (fungi)

Gona *Gonapodya proliferia* (Fungi)

Spun *Spizellomyces punctatus* DAOM BR117 (Fungi, Chytridiomycota, zoospore-producing soil fungi)

**Fig. S6.** Mass spectrometry of Skp1 modifications. Reactions were conducted at a PuSkp1A:PuPhgt ratio of 1:10 for 4 hrs. **(A)** Unreacted PuSkp1A. **(B)** The hydroxylation reaction included  $\alpha$ KG and O<sub>2</sub>. **(C)** The combined hydroxylation/GlcNAcylation reaction also included UDP-GlcNAc. Samples were analyzed by separation on a C4-column mounted on an Ultimate 3000 nLC in-line with a Q-Exactive+ Orbitrap. Data from these and other samples are summarized in Table II.

Figure S6

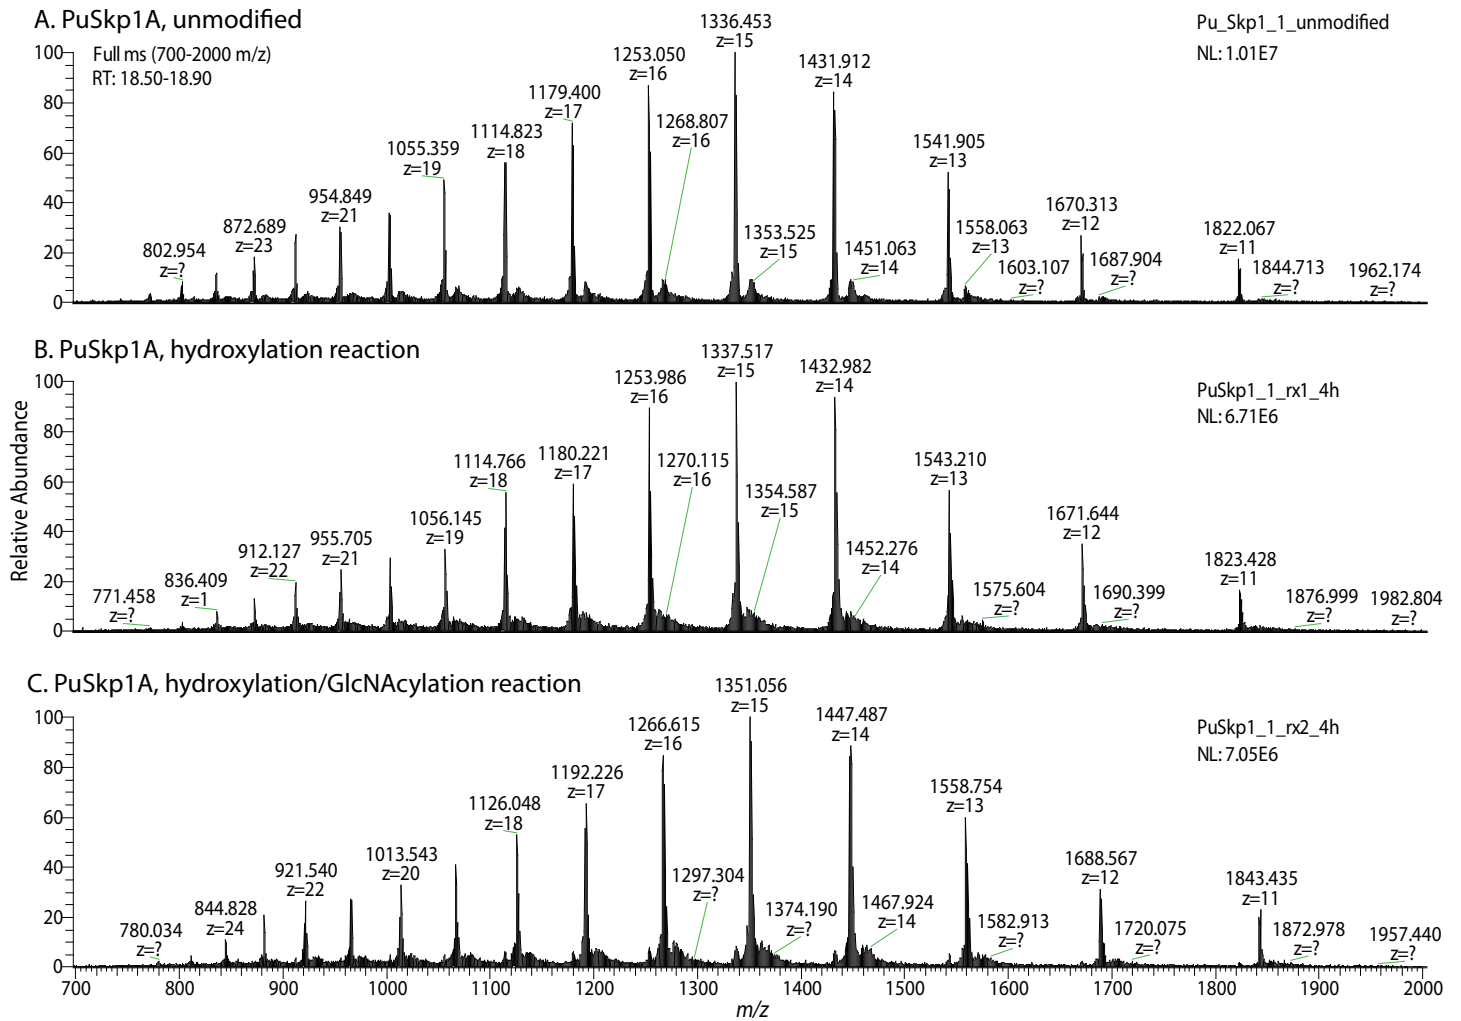

Supplement: supplement-pythium_27apr2019a_cwz049.pdf [file supplement-pythium_27apr2019a_cwz049.pdf]
